# Supplementary material
Source: Springer Nature journal article supplement (https://www.springermedizin.de/resource/supplementary/12875_2006_235_MOESM1_ESM.pdf/9436566)
Supplement: MOESM1 [file 9436566]

1. What do you understand by the term enteral tube feeding?
2. What comes to mind when you think of enteral tube feeding in the community?
3. What are your attitudes to enteral tube feeding in the community?

Probes:

Professional management

Prescribing issues

Patient selection

Information from secondary care

Involvement in decisions

4. What are your views on the training needs for GPs with respect to enteral tube feeding?

Probes:

Timing how long / when

Content

Where it should be carried out

Who should deliver the training?

5. Is there anything more you would like to say about enteral tube feeding in the community?
